# Supplementary material
Source: PubMed Central journal article supplement (PMC8482302)
Supplement: jamadermatol-e213676-s001.pdf [file jamadermatol-e213676-s001.pdf]

## Supplementary Online Content

Bhoyrul B, Asfour L, Lutz G, et al. Clinicopathologic characteristics and response to treatment of persistent chemotherapy-induced alopecia in breast cancer survivors. *JAMA Dermatol*. Published online September 29, 2021. doi:10.1001/jamadermatol.2021.3676

**eTable 1.** Clinical Features of 100 Patients With Persistent Chemotherapy-Induced Alopecia

**eTable 2.** Hair Counts Assessed in Horizontal Sections of 4-mm Punch Biopsies of the Scalp in Patients With Persistent Chemotherapy-Induced Alopecia

This supplementary material has been provided by the authors to give readers additional information about their work.

**eTable 1.** Clinical Features of 100 Patients With Persistent Chemotherapy-Induced Alopecia

| <b>Clinical feature</b>                             |             |
|-----------------------------------------------------|-------------|
| <b>Pattern of hair loss, No. (%)</b>                |             |
| Diffuse alopecia (DA)                               | 39 (39)     |
| Female pattern hair loss (FPHL)                     | 55 (55)     |
| Male pattern hair loss (MPHL)                       | 6 (6)       |
| Lichen planopilaris                                 | 3 (3)       |
| Frontal fibrosing alopecia                          | 2 (2)       |
| Fibrosing alopecia in a pattern distribution        | 1 (1)       |
| <b>Baseline severity of hair loss, median (IQR)</b> |             |
| DA or FPHL, Sinclair grade                          | 4 (2.5-5)   |
| MPHL, Hamilton-Norwood type                         | IV (II-VII) |
| <b>Trichoscopic feature, No. (%)</b>                |             |
| Hair shaft diameter variability                     | 76/86 (88)  |
| Vellus hairs                                        | 72/85 (85)  |
| Increased single-hair follicular units              | 32/62 (52)  |
| Perifollicular erythema/scaling                     | 8/89 (9)    |
| Loss of follicular ostia                            | 6/85 (7)    |
| Other*                                              | 33/90 (37)  |
| <b>Persistent alopecia at other sites, No. (%)</b>  |             |
| Eyebrows only                                       | 18 (18)     |
| Eyebrows and eyelashes                              | 32 (32)     |

IQR, interquartile range.

\* Included empty follicular ostia (n = 10), focal atrichia (n = 9), telangiectasia (n = 3), yellow dots (n = 3), irregular spacing of hair follicles (n = 2), follicular plugging (n = 1), kinky hairs (n = 1), lonely hairs (n = 1), peripilar sign (n = 1), pigtail hairs (n = 1) and pili torti (n = 1).

**eTable 2.** Hair Counts Assessed in Horizontal Sections of 4-mm Punch Biopsies of the Scalp in Patients With Persistent Chemotherapy-Induced Alopecia

|            | pCIA phenotype | Sinclair grade | Terminal | Anagen | Catagen/telogen | A:T ratio | Vellus | T:V ratio | Fibrous streamers |
|------------|----------------|----------------|----------|--------|-----------------|-----------|--------|-----------|-------------------|
| Patient 1  | FPHL           | 2              | 14       | NR     | NR              | NA        | 22     | 0.64      | 15                |
| Patient 2  | DA             | 5              | 23       | 12     | 11              | 1.09      | 11     | 2.17      | 9                 |
| Patient 3  | FPHL           | 4              | 17       | 13     | 4               | 3.25      | 9      | 1.83      | 6                 |
| Patient 4  | FPHL           | 5              | 25       | 15     | 10              | 1.50      | 12     | 2.12      | 6                 |
| Patient 5  | FPHL           | 4              | 11       | 4      | 7               | 0.57      | 7      | 1.60      | 12                |
| Patient 6  | FPHL           | 4              | 13       | 13     | 1               | 13.00     | 19     | 0.69      | 13                |
| Patient 7  | FPHL           | 5              | 18       | 16     | 2               | 8.00      | 13     | 1.42      | 8                 |
| Patient 8  | FPHL           | 4              | 12       | 7      | 5               | 1.40      | 6      | 2.11      | 3                 |
| Patient 9  | FPHL           | 5              | 23       | 10     | 13              | 0.77      | 7      | 3.22      | 13                |
| Patient 10 | FPHL           | 4              | 40       | NR     | NR              | NA        | 20     | 2.00      | 48                |
| Patient 11 | FPHL           | 4              | 17       | NR     | NR              | NA        | NR     | NA        | 8                 |
| Mean       |                | 4*             | 19       | 11     | 7               | 3.70      | 13     | 1.78      | 13                |

A:T, anagen:telogen; DA, diffuse alopecia; FPHL, female pattern hair loss; NA, not applicable; NR, not recorded; pCIA, persistent chemotherapy-induced alopecia; T:V, terminal:vellus.

\* Refers to median Sinclair grade.
